# Supplementary material for: Interlaboratory method validation of imaged capillary isoelectric focusing methodology for analysis of recombinant human erythropoietin
Source: Royal Society of Chemistry journal article supplement (doi:10.1039/d0ay00823k), 2020-01-01
Supplement: d0ay00823k1.pdf [file d0ay00823k1.pdf]

**Interlaboratory Method Validation of *Imaged Capillary Isoelectric Focusing* Methodology for  
Analysis of Recombinant Human Erythropoietin**

Xiang Li, Xingchang, Shi, Xi Qin, Lei Yu, Yong Zhou and Chunming Rao<sup>#</sup>

Key Laboratory of the Ministry of Health for Research on Quality and Standardization of Biotech  
Products, National Institutes for Food and Drug Control, No. 2, Tiantan Xili, Dongcheng District, Beijing,  
100050, China.

<sup>#</sup>Corresponding author. Email address: [lix@nifdc.org.cn](mailto:lix@nifdc.org.cn); [shixc@nifdc.org.cn](mailto:shixc@nifdc.org.cn); [raocm@nifdc.org.cn](mailto:raocm@nifdc.org.cn)

| Instrument | $\sigma$ | s       |
|------------|----------|---------|
| 1          | 1333     | 390741  |
| 2          | 21.97    | 2492.52 |
| 3          | 3075     | 190108  |
| 4          | 603.9    | 143699  |
| 5          | 998.2    | 182710  |
| 6          | 13.24    | 7301.40 |

**Table S1.** Sigma ( $\sigma$ ) and slope (s) values resulting from 3 replicates of the calibration curves used for LOQ determination.

| Instrument       | Urea (M) | Peak 1        |             | Peak 2       |             | Peak 3       |             | Peak 4       |             | Peak 5       |             | Peak 6       |             |
|------------------|----------|---------------|-------------|--------------|-------------|--------------|-------------|--------------|-------------|--------------|-------------|--------------|-------------|
|                  |          | Area%         | p/          | Area %       | p/          |
| 1                | 3        | 17.60         | 3.98        | 31.34        | 4.13        | 29.39        | 4.28        | 12.44        | 4.48        | 2.98         | 4.69        | 2.45         | 4.91        |
| 1                | 4        | 3.37          | 3.98        | 17.82        | 4.16        | 31.58        | 4.31        | 30.21        | 4.48        | 13.36        | 4.66        | 2.48         | 4.84        |
| 1                | 5        | 4.51          | 4.06        | 18.83        | 4.22        | 31.34        | 4.38        | 29.91        | 4.55        | 10.44        | 4.71        | 3.09         | 4.90        |
| 2                | 3        | 3.32          | 3.75        | 18.51        | 3.89        | 32.86        | 4.08        | 31.89        | 4.25        | 11.52        | 4.46        | 1.90         | 4.67        |
| 2                | 4        | 2.65          | 3.99        | 18.73        | 4.17        | 33.45        | 4.33        | 31.86        | 4.50        | 11.30        | 4.68        | 1.86         | 4.87        |
| 2                | 5        | 2.08          | 4.08        | 18.35        | 4.25        | 33.58        | 4.41        | 32.25        | 4.58        | 11.59        | 4.75        | 2.06         | 4.93        |
| 3                | 3        | 3.37          | 3.81        | 18.92        | 4.00        | 32.76        | 4.15        | 31.36        | 4.32        | 11.38        | 4.52        | 2.05         | 4.74        |
| 3                | 4        | 3.56          | 3.96        | 19.22        | 4.14        | 32.49        | 4.31        | 31.14        | 4.48        | 11.22        | 4.67        | 1.90         | 4.86        |
| 3                | 5        | 3.60          | 4.10        | 19.07        | 4.25        | 32.56        | 4.41        | 30.85        | 4.58        | 11.09        | 4.75        | 2.08         | 4.95        |
| 4                | 3        | 3.30          | 3.80        | 19.26        | 3.99        | 32.88        | 4.12        | 31.08        | 4.28        | 11.31        | 4.47        | 1.87         | 4.67        |
| 4                | 4        | 3.89          | 3.92        | 19.24        | 4.10        | 32.53        | 4.25        | 30.66        | 4.42        | 11.06        | 4.58        | 1.84         | 4.77        |
| 4                | 5        | 3.69          | 4.07        | 18.75        | 4.21        | 32.60        | 4.35        | 31.08        | 4.53        | 11.30        | 4.68        | 2.20         | 4.86        |
| 5                | 3        | 3.25          | 3.78        | 18.19        | 3.96        | 32.26        | 4.11        | 31.17        | 4.28        | 12.27        | 4.50        | 2.58         | 4.70        |
| 5                | 4        | 3.57          | 3.90        | 18.43        | 4.06        | 32.25        | 4.22        | 31.12        | 4.40        | 11.88        | 4.59        | 1.88         | 4.79        |
| 5                | 5        | 3.19          | 4.04        | 18.41        | 4.19        | 32.77        | 4.34        | 31.44        | 4.52        | 11.47        | 4.70        | 1.85         | 4.90        |
| 6                | 3        | 3.50          | 3.79        | 18.90        | 3.93        | 33.60        | 4.13        | 31.60        | 4.29        | 10.90        | 4.49        | 1.60         | 4.70        |
| 6                | 4        | 3.20          | 3.96        | 18.90        | 4.12        | 33.30        | 4.28        | 31.70        | 4.46        | 11.00        | 4.64        | 1.60         | 4.83        |
| 6                | 5        | 2.60          | 4.13        | 18.90        | 4.26        | 33.70        | 4.42        | 32.00        | 4.59        | 11.00        | 4.76        | 1.70         | 4.94        |
| <b>Mean</b>      | <b>3</b> | <b>5.72</b>   | <b>3.82</b> | <b>20.85</b> | <b>3.98</b> | <b>32.29</b> | <b>4.14</b> | <b>28.26</b> | <b>4.32</b> | <b>10.06</b> | <b>4.52</b> | <b>2.07</b>  | <b>4.73</b> |
| <b>Mean</b>      | <b>4</b> | <b>3.37</b>   | <b>3.95</b> | <b>18.72</b> | <b>4.12</b> | <b>32.60</b> | <b>4.28</b> | <b>31.11</b> | <b>4.46</b> | <b>11.64</b> | <b>4.64</b> | <b>1.93</b>  | <b>4.83</b> |
| <b>Mean</b>      | <b>5</b> | <b>3.28</b>   | <b>4.08</b> | <b>18.72</b> | <b>4.23</b> | <b>32.76</b> | <b>4.39</b> | <b>31.26</b> | <b>4.56</b> | <b>11.15</b> | <b>4.73</b> | <b>2.16</b>  | <b>4.91</b> |
| <b>Std. Dev.</b> | <b>3</b> | <b>5.82</b>   | <b>0.08</b> | <b>5.15</b>  | <b>0.08</b> | <b>1.48</b>  | <b>0.07</b> | <b>7.75</b>  | <b>0.08</b> | <b>3.50</b>  | <b>0.09</b> | <b>0.37</b>  | <b>0.09</b> |
| <b>Std. Dev.</b> | <b>4</b> | <b>0.42</b>   | <b>0.04</b> | <b>0.54</b>  | <b>0.04</b> | <b>0.69</b>  | <b>0.04</b> | <b>0.62</b>  | <b>0.04</b> | <b>0.90</b>  | <b>0.04</b> | <b>0.29</b>  | <b>0.04</b> |
| <b>Std. Dev.</b> | <b>5</b> | <b>0.86</b>   | <b>0.03</b> | <b>0.28</b>  | <b>0.03</b> | <b>0.85</b>  | <b>0.03</b> | <b>0.85</b>  | <b>0.03</b> | <b>0.41</b>  | <b>0.03</b> | <b>0.49</b>  | <b>0.03</b> |
| <b>%RSD</b>      | <b>3</b> | <b>101.68</b> | <b>2.14</b> | <b>24.70</b> | <b>2.06</b> | <b>4.60</b>  | <b>1.68</b> | <b>27.44</b> | <b>1.91</b> | <b>34.76</b> | <b>1.90</b> | <b>17.90</b> | <b>1.92</b> |
| <b>%RSD</b>      | <b>4</b> | <b>12.57</b>  | <b>0.90</b> | <b>2.87</b>  | <b>0.97</b> | <b>2.12</b>  | <b>0.99</b> | <b>2.00</b>  | <b>0.89</b> | <b>7.73</b>  | <b>0.90</b> | <b>15.18</b> | <b>0.81</b> |
| <b>%RSD</b>      | <b>5</b> | <b>26.17</b>  | <b>0.78</b> | <b>1.51</b>  | <b>0.67</b> | <b>2.60</b>  | <b>0.78</b> | <b>2.71</b>  | <b>0.67</b> | <b>3.70</b>  | <b>0.71</b> | <b>22.59</b> | <b>0.69</b> |

**Table S2.** Peak area % and apparent p/ values of all peaks resulting from the robustness test in varying urea concentrations.
